# Supplementary material for: Differential Effects of Open- and Closed-Loop Intracortical Microstimulation on Firing Patterns of Neurons in Distant Cortical Areas
Source: Oxford University Press journal article supplement (doi:10.1093/cercor/bhz281), 2019-10-21
Supplement: averna_manuscript_190130_supplemetary_bhz281.docx [file averna_manuscript_190130_supplemetary_bhz281.docx]

# Supplementary Materials

Table S1: Results of general linear mixed effects model on the logarithmic firing rate log(MFR): differences of Least Squares Means (the marginal means are estimated over a balanced population) calculated for the *Stim*Area*Time* effect. Significant p-values are colored: p-value .01-.05 (weak evidence) yellow, p-value <.01 (very strong evidence) red.

|  | | | Basal0 | | | | | Basal1 | | | | | Basal2 | | | | | Basal3 | | | | |
| --- | --- | --- | --- | --- | --- | --- | --- | --- | --- | --- | --- | --- | --- | --- | --- | --- | --- | --- | --- | --- | --- | --- |
| ADS | | RS | | CTRL | ADS | | RS | | CTRL | ADS | | RS | | CTRL | ADS | | RS | | CTRL |
| BF | FL | BF | FL | FL | BF | FL | BF | FL | FL | BF | FL | BF | FL | FL | BF | FL | BF | FL | FL |
| Basal0 | ADS | BF |  |  |  |  |  |  |  |  |  |  |  |  |  |  |  |  |  |  |  |  |
| FL |  |  |  |  |  |  |  |  |  |  |  |  |  |  |  |  |  |  |  |  |
| RS | BF |  |  |  |  |  |  |  |  |  |  |  |  |  |  |  |  |  |  |  |  |
| FL |  |  |  |  |  |  |  |  |  |  |  |  |  |  |  |  |  |  |  |  |
| CTRL | FL |  |  |  |  |  |  |  |  |  |  |  |  |  |  |  |  |  |  |  |  |
| Basal1 | ADS | BF |  |  |  |  |  |  |  |  |  |  |  |  |  |  |  |  |  |  |  |  |
| FL |  |  |  |  |  |  |  |  |  |  |  |  |  |  |  |  |  |  |  |  |
| RS | BF |  |  |  |  |  |  |  |  |  |  |  |  |  |  |  |  |  |  |  |  |
| FL |  |  |  |  |  |  |  |  |  |  |  |  |  |  |  |  |  |  |  |  |
| CTRL | FL |  |  |  |  |  |  |  |  |  |  |  |  |  |  |  |  |  |  |  |  |
| Basal2 | ADS | BF |  |  |  |  |  |  |  |  |  |  |  |  |  |  |  |  |  |  |  |  |
| FL |  |  |  |  |  |  |  |  |  |  |  |  |  |  |  |  |  |  |  |  |
| RS | BF |  |  |  |  |  |  |  |  |  |  |  |  |  |  |  |  |  |  |  |  |
| FL |  |  |  |  |  |  |  |  |  |  |  |  |  |  |  |  |  |  |  |  |
| CTRL | FL |  |  |  |  |  |  |  |  |  |  |  |  |  |  |  |  |  |  |  |  |
| Basal3 | ADS | BF |  |  |  |  |  |  |  |  |  |  |  |  |  |  |  |  |  |  |  |  |
| FL |  |  |  |  |  |  |  |  |  |  |  |  |  |  |  |  |  |  |  |  |
| RS | BF |  |  |  |  |  |  |  |  |  |  |  |  |  |  |  |  |  |  |  |  |
| FL |  |  |  |  |  |  |  |  |  |  |  |  |  |  |  |  |  |  |  |  |
| CTRL | FL |  |  |  |  |  |  |  |  |  |  |  |  |  |  |  |  |  |  |  |  |

Table S2: Results of the general linear mixed effects model on the LvR: differences of Least Squares Means (the marginal means are estimated over a balanced population) calculated for the *Stim*Area*Time* effect. Significant p-values are colored: p-value .01-.05 (weak evidence) yellow, p-value <.01 (very strong evidence) red.

|  | | | Basal0 | | | | | Basal1 | | | | | Basal2 | | | | | Basal3 | | | | |
| --- | --- | --- | --- | --- | --- | --- | --- | --- | --- | --- | --- | --- | --- | --- | --- | --- | --- | --- | --- | --- | --- | --- |
| ADS | | RS | | CTRL | ADS | | RS | | CTRL | ADS | | RS | | CTRL | ADS | | RS | | CTRL |
| BF | FL | BF | FL | FL | BF | FL | BF | FL | FL | BF | FL | BF | FL | FL | BF | FL | BF | FL | FL |
| Basal0 | ADS | BF |  |  |  |  |  |  |  |  |  |  |  |  |  |  |  |  |  |  |  |  |
| FL |  |  |  |  |  |  |  |  |  |  |  |  |  |  |  |  |  |  |  |  |
| RS | BF |  |  |  |  |  |  |  |  |  |  |  |  |  |  |  |  |  |  |  |  |
| FL |  |  |  |  |  |  |  |  |  |  |  |  |  |  |  |  |  |  |  |  |
| CTRL | FL |  |  |  |  |  |  |  |  |  |  |  |  |  |  |  |  |  |  |  |  |
| Basal1 | ADS | BF |  |  |  |  |  |  |  |  |  |  |  |  |  |  |  |  |  |  |  |  |
| FL |  |  |  |  |  |  |  |  |  |  |  |  |  |  |  |  |  |  |  |  |
| RS | BF |  |  |  |  |  |  |  |  |  |  |  |  |  |  |  |  |  |  |  |  |
| FL |  |  |  |  |  |  |  |  |  |  |  |  |  |  |  |  |  |  |  |  |
| CTRL | FL |  |  |  |  |  |  |  |  |  |  |  |  |  |  |  |  |  |  |  |  |
| Basal2 | ADS | BF |  |  |  |  |  |  |  |  |  |  |  |  |  |  |  |  |  |  |  |  |
| FL |  |  |  |  |  |  |  |  |  |  |  |  |  |  |  |  |  |  |  |  |
| RS | BF |  |  |  |  |  |  |  |  |  |  |  |  |  |  |  |  |  |  |  |  |
| FL |  |  |  |  |  |  |  |  |  |  |  |  |  |  |  |  |  |  |  |  |
| CTRL | FL |  |  |  |  |  |  |  |  |  |  |  |  |  |  |  |  |  |  |  |  |
| Basal3 | ADS | BF |  |  |  |  |  |  |  |  |  |  |  |  |  |  |  |  |  |  |  |  |
| FL |  |  |  |  |  |  |  |  |  |  |  |  |  |  |  |  |  |  |  |  |
| RS | BF |  |  |  |  |  |  |  |  |  |  |  |  |  |  |  |  |  |  |  |  |
| FL |  |  |  |  |  |  |  |  |  |  |  |  |  |  |  |  |  |  |  |  |
| CTRL | FL |  |  |  |  |  |  |  |  |  |  |  |  |  |  |  |  |  |  |  |  |

Table S3: Results of the general linear mixed effects model on the PSTH: differences of Least Squares Means (the marginal means are estimated over a balanced population) calculated for the *Stim*Area*Time* effect. Significant p-values are colored: p-value .01-.05 (weak evidence) yellow, p-value <.01 (very strong evidence) red.

|  | | | Stim1 | | | | Stim2 | | | | Stim3 | | | |
| --- | --- | --- | --- | --- | --- | --- | --- | --- | --- | --- | --- | --- | --- | --- |
| ADS | | RS | | ADS | | RS | | ADS | | RS | |
| BF | FL | BF | FL | BF | FL | BF | FL | BF | FL | BF | FL |
| Stim1 | ADS | BF |  |  |  |  |  |  |  |  |  |  |  |  |
| FL |  |  |  |  |  |  |  |  |  |  |  |  |
| RS | BF |  |  |  |  |  |  |  |  |  |  |  |  |
| FL |  |  |  |  |  |  |  |  |  |  |  |  |
| Stim2 | ADS | BF |  |  |  |  |  |  |  |  |  |  |  |  |
| FL |  |  |  |  |  |  |  |  |  |  |  |  |
| RS | BF |  |  |  |  |  |  |  |  |  |  |  |  |
| FL |  |  |  |  |  |  |  |  |  |  |  |  |
| Stim3 | ADS | BF |  |  |  |  |  |  |  |  |  |  |  |  |
| FL |  |  |  |  |  |  |  |  |  |  |  |  |
| RS | BF |  |  |  |  |  |  |  |  |  |  |  |  |
| FL |  |  |  |  |  |  |  |  |  |  |  |  |
